# Supplementary material for: Simulating transmission of ESKAPE pathogens plus C. difficile in relevant clinical scenarios
Source: BMC Infect Dis. 2020 Jun 12;20:411. doi: 10.1186/s12879-020-05121-4 (PMC7477864; doi:10.1186/s12879-020-05121-4)
Supplement: Supplementary file 1 — Additional file 1. [file 12879_2020_5121_MOESM1_ESM.xlsx]

## Sheet: Sheet1
Transfer Method	Mixture	Test Microorganisms	Inoculum Spike In	Fomite	Test Condition	Replicate	CFU/Vitro Skin Recovered from Secondary Coupon	Inoculated CFU/VitroSkin on Initial Coupon	Transmission Rate
Indirect	1	K. pneumoniae	High	Stainless Steel	No Wash	1	2100	1750000	0.0012
Indirect	1	K. pneumoniae	High	Stainless Steel	No Wash	2	250	1750000	0.000142857
Indirect	1	K. pneumoniae	High	Stainless Steel	No Wash	3	100	1750000	5.71429e-05
Indirect	1	A. baumannii	High	Stainless Steel	No Wash	1	650	450000	0.00144444
Indirect	1	A. baumannii	High	Stainless Steel	No Wash	2	200	450000	0.000444444
Indirect	1	A. baumannii	High	Stainless Steel	No Wash	3	50	450000	0.000111111
Indirect	1	E. faecium	High	Stainless Steel	No Wash	1	150	110000	0.00136364
Indirect	1	E. faecium	High	Stainless Steel	No Wash	2	250	110000	0.00227273
Indirect	1	E. faecium	High	Stainless Steel	No Wash	3	100	110000	0.000909091
Indirect	1	K. pneumoniae	High	Stainless Steel	Wash	1	300	1750000	0.000171429
Indirect	1	K. pneumoniae	High	Stainless Steel	Wash	2	550	1750000	0.000314286
Indirect	1	K. pneumoniae	High	Stainless Steel	Wash	3	50	1750000	2.85714e-05
Indirect	1	A. baumannii	High	Stainless Steel	Wash	1	300	450000	0.000666667
Indirect	1	A. baumannii	High	Stainless Steel	Wash	2	500	450000	0.00111111
Indirect	1	A. baumannii	High	Stainless Steel	Wash	3	50	450000	0.000111111
Indirect	1	E. faecium	High	Stainless Steel	Wash	1	0	110000	0
Indirect	1	E. faecium	High	Stainless Steel	Wash	2	0	110000	0
Indirect	1	E. faecium	High	Stainless Steel	Wash	3	0	110000	0
Indirect	1	K. pneumoniae	High	Nitrile Glove	No Wash	1	1350	1750000	0.000771429
Indirect	1	K. pneumoniae	High	Nitrile Glove	No Wash	2	50	1750000	2.85714e-05
Indirect	1	K. pneumoniae	High	Nitrile Glove	No Wash	3	200	1750000	0.000114286
Indirect	1	A. baumannii	High	Nitrile Glove	No Wash	1	500	450000	0.00111111
Indirect	1	A. baumannii	High	Nitrile Glove	No Wash	2	50	450000	0.000111111
Indirect	1	A. baumannii	High	Nitrile Glove	No Wash	3	200	450000	0.000444444
Indirect	1	E. faecium	High	Nitrile Glove	No Wash	1	50	110000	0.000454545
Indirect	1	E. faecium	High	Nitrile Glove	No Wash	2	100	110000	0.000909091
Indirect	1	E. faecium	High	Nitrile Glove	No Wash	3	100	110000	0.000909091
Indirect	1	K. pneumoniae	High	Nitrile Glove	Wash	1	250	1750000	0.000142857
Indirect	1	K. pneumoniae	High	Nitrile Glove	Wash	2	250	1750000	0.000142857
Indirect	1	K. pneumoniae	High	Nitrile Glove	Wash	3	150	1750000	8.57143e-05
Indirect	1	A. baumannii	High	Nitrile Glove	Wash	1	200	450000	0.000444444
Indirect	1	A. baumannii	High	Nitrile Glove	Wash	2	150	450000	0.000333333
Indirect	1	A. baumannii	High	Nitrile Glove	Wash	3	100	450000	0.000222222
Indirect	1	E. faecium	High	Nitrile Glove	Wash	1	0	110000	0
Indirect	1	E. faecium	High	Nitrile Glove	Wash	2	0	110000	0
Indirect	1	E. faecium	High	Nitrile Glove	Wash	3	0	110000	0
Indirect	1	K. pneumoniae	High	Cotton	No Wash	1	450	1750000	0.000257143
Indirect	1	K. pneumoniae	High	Cotton	No Wash	2	500	1750000	0.000285714
Indirect	1	K. pneumoniae	High	Cotton	No Wash	3	200	1750000	0.000114286
Indirect	1	A. baumannii	High	Cotton	No Wash	1	550	450000	0.00122222
Indirect	1	A. baumannii	High	Cotton	No Wash	2	250	450000	0.000555556
Indirect	1	A. baumannii	High	Cotton	No Wash	3	50	450000	0.000111111
Indirect	1	E. faecium	High	Cotton	No Wash	1	0	110000	0
Indirect	1	E. faecium	High	Cotton	No Wash	2	0	110000	0
Indirect	1	E. faecium	High	Cotton	No Wash	3	0	110000	0
Indirect	1	K. pneumoniae	High	Cotton	Wash	1	50	1750000	2.85714e-05
Indirect	1	K. pneumoniae	High	Cotton	Wash	2	100	1750000	5.71429e-05
Indirect	1	K. pneumoniae	High	Cotton	Wash	3	50	1750000	2.85714e-05
Indirect	1	A. baumannii	High	Cotton	Wash	1	0	450000	0
Indirect	1	A. baumannii	High	Cotton	Wash	2	0	450000	0
Indirect	1	A. baumannii	High	Cotton	Wash	3	0	450000	0
Indirect	1	E. faecium	High	Cotton	Wash	1	0	110000	0
Indirect	1	E. faecium	High	Cotton	Wash	2	0	110000	0
Indirect	1	E. faecium	High	Cotton	Wash	3	0	110000	0
Indirect	1	K. pneumoniae	Low	Stainless Steel	No Wash	1	120	220	0.545455
Indirect	1	K. pneumoniae	Low	Stainless Steel	No Wash	2	75	220	0.340909
Indirect	1	K. pneumoniae	Low	Stainless Steel	No Wash	3	90	220	0.409091
Indirect	1	A. baumannii	Low	Stainless Steel	No Wash	1	90	110	0.818182
Indirect	1	A. baumannii	Low	Stainless Steel	No Wash	2	40	110	0.363636
Indirect	1	A. baumannii	Low	Stainless Steel	No Wash	3	45	110	0.409091
Indirect	1	E. faecium	Low	Stainless Steel	No Wash	1	20	250	0.08
Indirect	1	E. faecium	Low	Stainless Steel	No Wash	2	45	250	0.18
Indirect	1	E. faecium	Low	Stainless Steel	No Wash	3	60	250	0.24
Indirect	1	K. pneumoniae	Low	Stainless Steel	Wash	1	20	220	0.0909091
Indirect	1	K. pneumoniae	Low	Stainless Steel	Wash	2	15	220	0.0681818
Indirect	1	K. pneumoniae	Low	Stainless Steel	Wash	3	10	220	0.0454545
Indirect	1	A. baumannii	Low	Stainless Steel	Wash	1	20	110	0.181818
Indirect	1	A. baumannii	Low	Stainless Steel	Wash	2	15	110	0.136364
Indirect	1	A. baumannii	Low	Stainless Steel	Wash	3	5	110	0.0454545
Indirect	1	E. faecium	Low	Stainless Steel	Wash	1	0	250	0
Indirect	1	E. faecium	Low	Stainless Steel	Wash	2	0	250	0
Indirect	1	E. faecium	Low	Stainless Steel	Wash	3	0	250	0
Indirect	1	K. pneumoniae	Low	Nitrile Glove	No Wash	1	135	220	0.613636
Indirect	1	K. pneumoniae	Low	Nitrile Glove	No Wash	2	85	220	0.386364
Indirect	1	K. pneumoniae	Low	Nitrile Glove	No Wash	3	15	220	0.0681818
Indirect	1	A. baumannii	Low	Nitrile Glove	No Wash	1	60	110	0.545455
Indirect	1	A. baumannii	Low	Nitrile Glove	No Wash	2	50	110	0.454545
Indirect	1	A. baumannii	Low	Nitrile Glove	No Wash	3	25	110	0.227273
Indirect	1	E. faecium	Low	Nitrile Glove	No Wash	1	45	250	0.18
Indirect	1	E. faecium	Low	Nitrile Glove	No Wash	2	45	250	0.18
Indirect	1	E. faecium	Low	Nitrile Glove	No Wash	3	15	250	0.06
Indirect	1	K. pneumoniae	Low	Nitrile Glove	Wash	1	5	220	0.0227273
Indirect	1	K. pneumoniae	Low	Nitrile Glove	Wash	2	5	220	0.0227273
Indirect	1	K. pneumoniae	Low	Nitrile Glove	Wash	3	5	220	0.0227273
Indirect	1	A. baumannii	Low	Nitrile Glove	Wash	1	5	110	0.0454545
Indirect	1	A. baumannii	Low	Nitrile Glove	Wash	2	5	110	0.0454545
Indirect	1	A. baumannii	Low	Nitrile Glove	Wash	3	5	110	0.0454545
Indirect	1	E. faecium	Low	Nitrile Glove	Wash	1	0	250	0
Indirect	1	E. faecium	Low	Nitrile Glove	Wash	2	0	250	0
Indirect	1	E. faecium	Low	Nitrile Glove	Wash	3	0	250	0
Indirect	1	K. pneumoniae	Low	Cotton	No Wash	1	45	220	0.204545
Indirect	1	K. pneumoniae	Low	Cotton	No Wash	2	90	220	0.409091
Indirect	1	K. pneumoniae	Low	Cotton	No Wash	3	35	220	0.159091
Indirect	1	A. baumannii	Low	Cotton	No Wash	1	50	110	0.454545
Indirect	1	A. baumannii	Low	Cotton	No Wash	2	25	110	0.227273
Indirect	1	A. baumannii	Low	Cotton	No Wash	3	20	110	0.181818
Indirect	1	E. faecium	Low	Cotton	No Wash	1	15	250	0.06
Indirect	1	E. faecium	Low	Cotton	No Wash	2	5	250	0.02
Indirect	1	E. faecium	Low	Cotton	No Wash	3	5	250	0.02
Indirect	1	K. pneumoniae	Low	Cotton	Wash	1	0	220	0
Indirect	1	K. pneumoniae	Low	Cotton	Wash	2	0	220	0
Indirect	1	K. pneumoniae	Low	Cotton	Wash	3	0	220	0
Indirect	1	A. baumannii	Low	Cotton	Wash	1	0	110	0
Indirect	1	A. baumannii	Low	Cotton	Wash	2	0	110	0
Indirect	1	A. baumannii	Low	Cotton	Wash	3	0	110	0
Indirect	1	E. faecium	Low	Cotton	Wash	1	0	250	0
Indirect	1	E. faecium	Low	Cotton	Wash	2	0	250	0
Indirect	1	E. faecium	Low	Cotton	Wash	3	0	250	0
Indirect	2	K. aerogenes	High	Stainless Steel	No Wash	1	90	480000	0.0001875
Indirect	2	K. aerogenes	High	Stainless Steel	No Wash	2	15	480000	3.125e-05
Indirect	2	K. aerogenes	High	Stainless Steel	No Wash	3	20	480000	4.16667e-05
Indirect	2	S. aureus	High	Stainless Steel	No Wash	1	14070	550000	0.0255818
Indirect	2	S. aureus	High	Stainless Steel	No Wash	2	11520	550000	0.0209455
Indirect	2	S. aureus	High	Stainless Steel	No Wash	3	8600	550000	0.0156364
Indirect	2	K. aerogenes	High	Stainless Steel	Wash	1	0	480000	0
Indirect	2	K. aerogenes	High	Stainless Steel	Wash	2	0	480000	0
Indirect	2	K. aerogenes	High	Stainless Steel	Wash	3	0	480000	0
Indirect	2	S. aureus	High	Stainless Steel	Wash	1	8240	550000	0.0149818
Indirect	2	S. aureus	High	Stainless Steel	Wash	2	12400	550000	0.0225455
Indirect	2	S. aureus	High	Stainless Steel	Wash	3	12000	550000	0.0218182
Indirect	2	K. aerogenes	High	Nitrile Glove	No Wash	1	20	480000	4.16667e-05
Indirect	2	K. aerogenes	High	Nitrile Glove	No Wash	2	35	480000	7.29167e-05
Indirect	2	K. aerogenes	High	Nitrile Glove	No Wash	3	20	480000	4.16667e-05
Indirect	2	S. aureus	High	Nitrile Glove	No Wash	1	7880	550000	0.0143273
Indirect	2	S. aureus	High	Nitrile Glove	No Wash	2	9200	550000	0.0167273
Indirect	2	S. aureus	High	Nitrile Glove	No Wash	3	9960	550000	0.0181091
Indirect	2	K. aerogenes	High	Nitrile Glove	Wash	1	0	480000	0
Indirect	2	K. aerogenes	High	Nitrile Glove	Wash	2	0	480000	0
Indirect	2	K. aerogenes	High	Nitrile Glove	Wash	3	0	480000	0
Indirect	2	S. aureus	High	Nitrile Glove	Wash	1	16000	550000	0.0290909
Indirect	2	S. aureus	High	Nitrile Glove	Wash	2	7920	550000	0.0144
Indirect	2	S. aureus	High	Nitrile Glove	Wash	3	10400	550000	0.0189091
Indirect	2	K. aerogenes	High	Cotton	No Wash	1	15	480000	3.125e-05
Indirect	2	K. aerogenes	High	Cotton	No Wash	2	10	480000	2.08333e-05
Indirect	2	K. aerogenes	High	Cotton	No Wash	3	10	480000	2.08333e-05
Indirect	2	S. aureus	High	Cotton	No Wash	1	5840	550000	0.0106182
Indirect	2	S. aureus	High	Cotton	No Wash	2	6920	550000	0.0125818
Indirect	2	S. aureus	High	Cotton	No Wash	3	16000	550000	0.0290909
Indirect	2	K. aerogenes	High	Cotton	Wash	1	0	480000	0
Indirect	2	K. aerogenes	High	Cotton	Wash	2	0	480000	0
Indirect	2	K. aerogenes	High	Cotton	Wash	3	0	480000	0
Indirect	2	S. aureus	High	Cotton	Wash	1	4880	550000	0.00887273
Indirect	2	S. aureus	High	Cotton	Wash	2	3920	550000	0.00712727
Indirect	2	S. aureus	High	Cotton	Wash	3	3960	550000	0.0072
Indirect	2	K. aerogenes	Low	Stainless Steel	No Wash	1	25	175	0.142857
Indirect	2	K. aerogenes	Low	Stainless Steel	No Wash	2	10	175	0.0571429
Indirect	2	K. aerogenes	Low	Stainless Steel	No Wash	3	5	175	0.0285714
Indirect	2	S. aureus	Low	Stainless Steel	No Wash	1	175	1200	0.145833
Indirect	2	S. aureus	Low	Stainless Steel	No Wash	2	135	1200	0.1125
Indirect	2	S. aureus	Low	Stainless Steel	No Wash	3	90	1200	0.075
Indirect	2	K. aerogenes	Low	Stainless Steel	Wash	1	0	175	0
Indirect	2	K. aerogenes	Low	Stainless Steel	Wash	2	0	175	0
Indirect	2	K. aerogenes	Low	Stainless Steel	Wash	3	0	175	0
Indirect	2	S. aureus	Low	Stainless Steel	Wash	1	25	1200	0.0208333
Indirect	2	S. aureus	Low	Stainless Steel	Wash	2	30	1200	0.025
Indirect	2	S. aureus	Low	Stainless Steel	Wash	3	35	1200	0.0291667
Indirect	2	K. aerogenes	Low	Nitrile Glove	No Wash	1	30	175	0.171429
Indirect	2	K. aerogenes	Low	Nitrile Glove	No Wash	2	15	175	0.0857143
Indirect	2	K. aerogenes	Low	Nitrile Glove	No Wash	3	5	175	0.0285714
Indirect	2	S. aureus	Low	Nitrile Glove	No Wash	1	85	1200	0.0708333
Indirect	2	S. aureus	Low	Nitrile Glove	No Wash	2	140	1200	0.116667
Indirect	2	S. aureus	Low	Nitrile Glove	No Wash	3	70	1200	0.0583333
Indirect	2	K. aerogenes	Low	Nitrile Glove	Wash	1		175	0
Indirect	2	K. aerogenes	Low	Nitrile Glove	Wash	2		175	0
Indirect	2	K. aerogenes	Low	Nitrile Glove	Wash	3		175	0
Indirect	2	S. aureus	Low	Nitrile Glove	Wash	1	20	1200	0.0166667
Indirect	2	S. aureus	Low	Nitrile Glove	Wash	2	75	1200	0.0625
Indirect	2	S. aureus	Low	Nitrile Glove	Wash	3	25	1200	0.0208333
Indirect	2	K. aerogenes	Low	Cotton	No Wash	1		175	0
Indirect	2	K. aerogenes	Low	Cotton	No Wash	2		175	0
Indirect	2	K. aerogenes	Low	Cotton	No Wash	3		175	0
Indirect	2	S. aureus	Low	Cotton	No Wash	1	145	1200	0.120833
Indirect	2	S. aureus	Low	Cotton	No Wash	2	30	1200	0.025
Indirect	2	S. aureus	Low	Cotton	No Wash	3	35	1200	0.0291667
Indirect	2	K. aerogenes	Low	Cotton	Wash	1		175	0
Indirect	2	K. aerogenes	Low	Cotton	Wash	2		175	0
Indirect	2	K. aerogenes	Low	Cotton	Wash	3		175	0
Indirect	2	S. aureus	Low	Cotton	Wash	1	15	1200	0.0125
Indirect	2	S. aureus	Low	Cotton	Wash	2	10	1200	0.00833333
Indirect	2	S. aureus	Low	Cotton	Wash	3	5	1200	0.00416667
Indirect	3	C. difficle	High	Stainless Steel	No Wash	1	1670	6700000	0.000249254
Indirect	3	C. difficle	High	Stainless Steel	No Wash	2	1110	6700000	0.000165672
Indirect	3	C. difficle	High	Stainless Steel	No Wash	3	1425	6700000	0.000212687
Indirect	3	E. cloacae	High	Stainless Steel	No Wash	1	5	305000	1.63934e-05
Indirect	3	E. cloacae	High	Stainless Steel	No Wash	2	490	305000	0.00160656
Indirect	3	E. cloacae	High	Stainless Steel	No Wash	3	5	305000	1.63934e-05
Indirect	3	P. aeruginosa	High	Stainless Steel	No Wash	1	10	1420000	7.04225e-06
Indirect	3	P. aeruginosa	High	Stainless Steel	No Wash	2	450	1420000	0.000316901
Indirect	3	P. aeruginosa	High	Stainless Steel	No Wash	3	145	1420000	0.000102113
Indirect	3	C. difficle	High	Stainless Steel	Wash	1	0	6700000	0
Indirect	3	C. difficle	High	Stainless Steel	Wash	2	0	6700000	0
Indirect	3	C. difficle	High	Stainless Steel	Wash	3	0	6700000	0
Indirect	3	E. cloacae	High	Stainless Steel	Wash	1	5	305000	1.63934e-05
Indirect	3	E. cloacae	High	Stainless Steel	Wash	2	0	305000	0
Indirect	3	E. cloacae	High	Stainless Steel	Wash	3	0	305000	0
Indirect	3	P. aeruginosa	High	Stainless Steel	Wash	1	0	1420000	0
Indirect	3	P. aeruginosa	High	Stainless Steel	Wash	2	0	1420000	0
Indirect	3	P. aeruginosa	High	Stainless Steel	Wash	3	0	1420000	0
Indirect	3	C. difficle	High	Nitrile Glove	No Wash	1	1585	6700000	0.000236567
Indirect	3	C. difficle	High	Nitrile Glove	No Wash	2	1445	6700000	0.000215672
Indirect	3	C. difficle	High	Nitrile Glove	No Wash	3	1335	6700000	0.000199254
Indirect	3	E. cloacae	High	Nitrile Glove	No Wash	1	170	305000	0.000557377
Indirect	3	E. cloacae	High	Nitrile Glove	No Wash	2	5	305000	1.63934e-05
Indirect	3	E. cloacae	High	Nitrile Glove	No Wash	3	5	305000	1.63934e-05
Indirect	3	P. aeruginosa	High	Nitrile Glove	No Wash	1	275	1420000	0.000193662
Indirect	3	P. aeruginosa	High	Nitrile Glove	No Wash	2	15	1420000	1.05634e-05
Indirect	3	P. aeruginosa	High	Nitrile Glove	No Wash	3	5	1420000	3.52113e-06
Indirect	3	C. difficle	High	Nitrile Glove	Wash	1	0	6700000	0
Indirect	3	C. difficle	High	Nitrile Glove	Wash	2	0	6700000	0
Indirect	3	C. difficle	High	Nitrile Glove	Wash	3	0	6700000	0
Indirect	3	E. cloacae	High	Nitrile Glove	Wash	1	0	305000	0
Indirect	3	E. cloacae	High	Nitrile Glove	Wash	2	0	305000	0
Indirect	3	E. cloacae	High	Nitrile Glove	Wash	3	0	305000	0
Indirect	3	P. aeruginosa	High	Nitrile Glove	Wash	1	0	1420000	0
Indirect	3	P. aeruginosa	High	Nitrile Glove	Wash	2	0	1420000	0
Indirect	3	P. aeruginosa	High	Nitrile Glove	Wash	3	0	1420000	0
Indirect	3	C. difficle	High	Cotton	No Wash	1	225	6700000	3.35821e-05
Indirect	3	C. difficle	High	Cotton	No Wash	2	600	6700000	8.95522e-05
Indirect	3	C. difficle	High	Cotton	No Wash	3	245	6700000	3.65672e-05
Indirect	3	E. cloacae	High	Cotton	No Wash	1	5	305000	1.63934e-05
Indirect	3	E. cloacae	High	Cotton	No Wash	2	65	305000	0.000213115
Indirect	3	E. cloacae	High	Cotton	No Wash	3	10	305000	3.27869e-05
Indirect	3	P. aeruginosa	High	Cotton	No Wash	1	25	1420000	1.76056e-05
Indirect	3	P. aeruginosa	High	Cotton	No Wash	2	25	1420000	1.76056e-05
Indirect	3	P. aeruginosa	High	Cotton	No Wash	3	10	1420000	7.04225e-06
Indirect	3	C. difficle	High	Cotton	Wash	1	0	6700000	0
Indirect	3	C. difficle	High	Cotton	Wash	2	0	6700000	0
Indirect	3	C. difficle	High	Cotton	Wash	3	0	6700000	0
Indirect	3	E. cloacae	High	Cotton	Wash	1	0	305000	0
Indirect	3	E. cloacae	High	Cotton	Wash	2	0	305000	0
Indirect	3	E. cloacae	High	Cotton	Wash	3	0	305000	0
Indirect	3	P. aeruginosa	High	Cotton	Wash	1	0	1420000	0
Indirect	3	P. aeruginosa	High	Cotton	Wash	2	0	1420000	0
Indirect	3	P. aeruginosa	High	Cotton	Wash	3	0	1420000	0
Indirect	3	C. difficle	Low	Stainless Steel	No Wash	1	535	6800	0.0786765
Indirect	3	C. difficle	Low	Stainless Steel	No Wash	2	565	6800	0.0830882
Indirect	3	C. difficle	Low	Stainless Steel	No Wash	3	675	6800	0.0992647
Indirect	3	E. cloacae	Low	Stainless Steel	No Wash	1	5	355	0.0140845
Indirect	3	E. cloacae	Low	Stainless Steel	No Wash	2	5	355	0.0140845
Indirect	3	E. cloacae	Low	Stainless Steel	No Wash	3	5	355	0.0140845
Indirect	3	P. aeruginosa	Low	Stainless Steel	No Wash	1	120	770	0.155844
Indirect	3	P. aeruginosa	Low	Stainless Steel	No Wash	2	35	770	0.0454545
Indirect	3	P. aeruginosa	Low	Stainless Steel	No Wash	3	60	770	0.0779221
Indirect	3	C. difficle	Low	Stainless Steel	Wash	1	0	6800	0
Indirect	3	C. difficle	Low	Stainless Steel	Wash	2	0	6800	0
Indirect	3	C. difficle	Low	Stainless Steel	Wash	3	0	6800	0
Indirect	3	E. cloacae	Low	Stainless Steel	Wash	1	0	355	0
Indirect	3	E. cloacae	Low	Stainless Steel	Wash	2	0	355	0
Indirect	3	E. cloacae	Low	Stainless Steel	Wash	3	0	355	0
Indirect	3	P. aeruginosa	Low	Stainless Steel	Wash	1	0	770	0
Indirect	3	P. aeruginosa	Low	Stainless Steel	Wash	2	0	770	0
Indirect	3	P. aeruginosa	Low	Stainless Steel	Wash	3	0	770	0
Indirect	3	C. difficle	Low	Nitrile Glove	No Wash	1	720	6800	0.105882
Indirect	3	C. difficle	Low	Nitrile Glove	No Wash	2	385	6800	0.0566176
Indirect	3	C. difficle	Low	Nitrile Glove	No Wash	3	445	6800	0.0654412
Indirect	3	E. cloacae	Low	Nitrile Glove	No Wash	1	5	355	0.0140845
Indirect	3	E. cloacae	Low	Nitrile Glove	No Wash	2	5	355	0.0140845
Indirect	3	E. cloacae	Low	Nitrile Glove	No Wash	3	5	355	0.0140845
Indirect	3	P. aeruginosa	Low	Nitrile Glove	No Wash	1	30	770	0.038961
Indirect	3	P. aeruginosa	Low	Nitrile Glove	No Wash	2	15	770	0.0194805
Indirect	3	P. aeruginosa	Low	Nitrile Glove	No Wash	3	15	770	0.0194805
Indirect	3	C. difficle	Low	Nitrile Glove	Wash	1	0	6800	0
Indirect	3	C. difficle	Low	Nitrile Glove	Wash	2	0	6800	0
Indirect	3	C. difficle	Low	Nitrile Glove	Wash	3	0	6800	0
Indirect	3	E. cloacae	Low	Nitrile Glove	Wash	1	0	355	0
Indirect	3	E. cloacae	Low	Nitrile Glove	Wash	2	0	355	0
Indirect	3	E. cloacae	Low	Nitrile Glove	Wash	3	0	355	0
Indirect	3	P. aeruginosa	Low	Nitrile Glove	Wash	1	0	770	0
Indirect	3	P. aeruginosa	Low	Nitrile Glove	Wash	2	0	770	0
Indirect	3	P. aeruginosa	Low	Nitrile Glove	Wash	3	0	770	0
Indirect	3	C. difficle	Low	Cotton	No Wash	1	260	6800	0.0382353
Indirect	3	C. difficle	Low	Cotton	No Wash	2	270	6800	0.0397059
Indirect	3	C. difficle	Low	Cotton	No Wash	3	210	6800	0.0308824
Indirect	3	E. cloacae	Low	Cotton	No Wash	1	5	355	0.0140845
Indirect	3	E. cloacae	Low	Cotton	No Wash	2	5	355	0.0140845
Indirect	3	E. cloacae	Low	Cotton	No Wash	3	5	355	0.0140845
Indirect	3	P. aeruginosa	Low	Cotton	No Wash	1	5	770	0.00649351
Indirect	3	P. aeruginosa	Low	Cotton	No Wash	2	10	770	0.012987
Indirect	3	P. aeruginosa	Low	Cotton	No Wash	3	5	770	0.00649351
Indirect	3	C. difficle	Low	Cotton	Wash	1	0	6800	0
Indirect	3	C. difficle	Low	Cotton	Wash	2	0	6800	0
Indirect	3	C. difficle	Low	Cotton	Wash	3	0	6800	0
Indirect	3	E. cloacae	Low	Cotton	Wash	1	0	355	0
Indirect	3	E. cloacae	Low	Cotton	Wash	2	0	355	0
Indirect	3	E. cloacae	Low	Cotton	Wash	3	0	355	0
Indirect	3	P. aeruginosa	Low	Cotton	Wash	1	0	770	0
Indirect	3	P. aeruginosa	Low	Cotton	Wash	2	0	770	0
Indirect	3	P. aeruginosa	Low	Cotton	Wash	3	0	770	0
Direct	1	K. pneumoniae	High	Direct	No Wash	1	7350	3500000	0.0021
Direct	1	K. pneumoniae	High	Direct	No Wash	2	8500	3500000	0.00242857
Direct	1	K. pneumoniae	High	Direct	No Wash	3	12950	3500000	0.0037
Direct	1	K. pneumoniae	Low	Direct	No Wash	1	90	160	0.5625
Direct	1	K. pneumoniae	Low	Direct	No Wash	2	5	160	0.03125
Direct	1	K. pneumoniae	Low	Direct	No Wash	3	10	160	0.0625
Direct	1	A. baumannii	High	Direct	No Wash	1	8650	1150000	0.00752174
Direct	1	A. baumannii	High	Direct	No Wash	2	14100	1150000	0.0122609
Direct	1	A. baumannii	High	Direct	No Wash	3	9850	1150000	0.00856522
Direct	1	A. baumannii	Low	Direct	No Wash	1	10	50	0.2
Direct	1	A. baumannii	Low	Direct	No Wash	2	5	50	0.1
Direct	1	A. baumannii	Low	Direct	No Wash	3	5	50	0.1
Direct	1	E. faecium	High	Direct	No Wash	1	26800	5100000	0.0052549
Direct	1	E. faecium	High	Direct	No Wash	2	4100	5100000	0.000803922
Direct	1	E. faecium	High	Direct	No Wash	3	5150	5100000	0.0010098
Direct	1	E. faecium	Low	Direct	No Wash	1	6840	48900	0.139877
Direct	1	E. faecium	Low	Direct	No Wash	2	9040	48900	0.184867
Direct	1	E. faecium	Low	Direct	No Wash	3	5480	48900	0.112065
Direct	1	K. pneumoniae	High	Direct	Wash	1	4800	3500000	0.00137143
Direct	1	K. pneumoniae	High	Direct	Wash	2	12800	3500000	0.00365714
Direct	1	K. pneumoniae	High	Direct	Wash	3	10400	3500000	0.00297143
Direct	1	K. pneumoniae	Low	Direct	Wash	1	25	160	0.15625
Direct	1	K. pneumoniae	Low	Direct	Wash	2	25	160	0.15625
Direct	1	K. pneumoniae	Low	Direct	Wash	3	10	160	0.0625
Direct	1	A. baumannii	High	Direct	Wash	1	950	1150000	0.000826087
Direct	1	A. baumannii	High	Direct	Wash	2	1750	1150000	0.00152174
Direct	1	A. baumannii	High	Direct	Wash	3	1600	1150000	0.0013913
Direct	1	A. baumannii	Low	Direct	Wash	1	5	50	0.1
Direct	1	A. baumannii	Low	Direct	Wash	2	5	50	0.1
Direct	1	A. baumannii	Low	Direct	Wash	3	5	50	0.1
Direct	1	E. faecium	High	Direct	Wash	1	5300	5100000	0.00103922
Direct	1	E. faecium	High	Direct	Wash	2	1600	5100000	0.000313725
Direct	1	E. faecium	High	Direct	Wash	3	2850	5100000	0.000558824
Direct	1	E. faecium	Low	Direct	Wash	1	7520	48900	0.153783
Direct	1	E. faecium	Low	Direct	Wash	2	2200	48900	0.0449898
Direct	1	E. faecium	Low	Direct	Wash	3	5580	48900	0.11411
Direct	2	S. aureus	High	Direct	No Wash	1	44200	7200000	0.00613889
Direct	2	S. aureus	High	Direct	No Wash	2	60000	7200000	0.00833333
Direct	2	S. aureus	High	Direct	No Wash	3	58600	7200000	0.00813889
Direct	2	S. aureus	Low	Direct	No Wash	1	545	900	0.605556
Direct	2	S. aureus	Low	Direct	No Wash	2	495	900	0.55
Direct	2	S. aureus	Low	Direct	No Wash	3	620	900	0.688889
Direct	2	E. aerogenes	High	Direct	No Wash	1	26800	7650000	0.00350327
Direct	2	E. aerogenes	High	Direct	No Wash	2	17400	7650000	0.00227451
Direct	2	E. aerogenes	High	Direct	No Wash	3	14800	7650000	0.00193464
Direct	2	E. aerogenes	Low	Direct	No Wash	1	5	900	0.00555556
Direct	2	E. aerogenes	Low	Direct	No Wash	2	10	900	0.0111111
Direct	2	E. aerogenes	Low	Direct	No Wash	3	115	900	0.127778
Direct	2	S. aureus	High	Direct	Wash	1	8950	7200000	0.00124306
Direct	2	S. aureus	High	Direct	Wash	2	15400	7200000	0.00213889
Direct	2	S. aureus	High	Direct	Wash	3	5150	7200000	0.000715278
Direct	2	S. aureus	Low	Direct	Wash	1	315	900	0.35
Direct	2	S. aureus	Low	Direct	Wash	2	185	900	0.205556
Direct	2	S. aureus	Low	Direct	Wash	3	160	900	0.177778
Direct	2	E. aerogenes	High	Direct	Wash	1	20500	7650000	0.00267974
Direct	2	E. aerogenes	High	Direct	Wash	2	30800	7650000	0.00402614
Direct	2	E. aerogenes	High	Direct	Wash	3	15400	7650000	0.00201307
Direct	2	E. aerogenes	Low	Direct	Wash	1	35	900	0.0388889
Direct	2	E. aerogenes	Low	Direct	Wash	2	35	900	0.0388889
Direct	2	E. aerogenes	Low	Direct	Wash	3	5	900	0.00555556
Direct	3	C. difficle	High	Direct	No Wash	1	126500	7800000	0.0162179
Direct	3	C. difficle	High	Direct	No Wash	2	386000	7800000	0.0494872
Direct	3	C. difficle	High	Direct	No Wash	3	424000	7800000	0.054359
Direct	3	C. difficle	Low	Direct	No Wash	1	2880	55200	0.0521739
Direct	3	C. difficle	Low	Direct	No Wash	2	2000	55200	0.0362319
Direct	3	C. difficle	Low	Direct	No Wash	3	3040	55200	0.0550725
Direct	3	E. cloacae	High	Direct	No Wash	1	119500	1600000	0.0746875
Direct	3	E. cloacae	High	Direct	No Wash	2	92000	1600000	0.0575
Direct	3	E. cloacae	High	Direct	No Wash	3	94500	1600000	0.0590625
Direct	3	E. cloacae	Low	Direct	No Wash	1	0	20	0
Direct	3	E. cloacae	Low	Direct	No Wash	2	0	20	0
Direct	3	E. cloacae	Low	Direct	No Wash	3	0	20	0
Direct	3	P. aeruginosa	High	Direct	No Wash	1	95500	3800000	0.0251316
Direct	3	P. aeruginosa	High	Direct	No Wash	2	62000	3800000	0.0163158
Direct	3	P. aeruginosa	High	Direct	No Wash	3	88000	3800000	0.0231579
Direct	3	P. aeruginosa	Low	Direct	No Wash	1	25	35	0.714286
Direct	3	P. aeruginosa	Low	Direct	No Wash	2	10	35	0.285714
Direct	3	P. aeruginosa	Low	Direct	No Wash	3	30	35	0.857143
Direct	3	C. difficle	High	Direct	Wash	1	52000	7800000	0.00666667
Direct	3	C. difficle	High	Direct	Wash	2	226000	7800000	0.0289744
Direct	3	C. difficle	High	Direct	Wash	3	364000	7800000	0.0466667
Direct	3	C. difficle	Low	Direct	Wash	1	1960	55200	0.0355072
Direct	3	C. difficle	Low	Direct	Wash	2	1160	55200	0.0210145
Direct	3	C. difficle	Low	Direct	Wash	3	1920	55200	0.0347826
Direct	3	E. cloacae	High	Direct	Wash	1	34500	1600000	0.0215625
Direct	3	E. cloacae	High	Direct	Wash	2	42500	1600000	0.0265625
Direct	3	E. cloacae	High	Direct	Wash	3	3500	1600000	0.0021875
Direct	3	E. cloacae	Low	Direct	Wash	1	0	20	0
Direct	3	E. cloacae	Low	Direct	Wash	2	0	20	0
Direct	3	E. cloacae	Low	Direct	Wash	3	0	20	0
Direct	3	P. aeruginosa	High	Direct	Wash	1	54000	3800000	0.0142105
Direct	3	P. aeruginosa	High	Direct	Wash	2	56500	3800000	0.0148684
Direct	3	P. aeruginosa	High	Direct	Wash	3	1000	3800000	0.000263158
Direct	3	P. aeruginosa	Low	Direct	Wash	1	20	35	0.571429
Direct	3	P. aeruginosa	Low	Direct	Wash	2	30	35	0.857143
Direct	3	P. aeruginosa	Low	Direct	Wash	3	20	35	0.571429
